# Supplementary material for: Quantifying the contribution of transport to Antarctic springtime ozone column variability
Source: Copernicus journal article supplement (doi:10.5194/acp-25-17527-2025), 2025-12-03
Supplement: Supplementary file [file acp-25-17527-2025-supplement-title-page.pdf › acp-25-17527-2025-supplement-title-page.pdf]

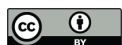

*Supplement of*

## **Quantifying the contribution of transport to Antarctic springtime ozone column variability**

**Hannah E. Kessenich et al.**

*Correspondence to:* Hannah E. Kessenich ([hannah.kessenich@otago.ac.nz](mailto:hannah.kessenich@otago.ac.nz))

- [acp-25-17527-2025-supplement-title-page.pdf](#)
- [MPA\\_Animation.gif](#)

The copyright of individual parts of the supplement might differ from the article licence.
